# Supplementary material
Source: publisher site journal article supplement (https://cdn.jamanetwork.com/ama/content_public/journal/jama/938494/joi200055supp1_prod.pdf)

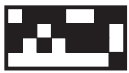

17100

171-A

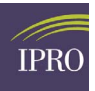

### SARS-COV2 (COVID-19) Testing Results

**Test 1**

| COVID-19 Test                                                                                                                                                                              | Collection Date<br>(mm/dd/yyyy) | Result Date<br>(mm/dd/yyyy) | Testing Facility<br>PFI | Other Facility<br>PFI | Test Result                                                                                                                                                              |
|--------------------------------------------------------------------------------------------------------------------------------------------------------------------------------------------|---------------------------------|-----------------------------|-------------------------|-----------------------|--------------------------------------------------------------------------------------------------------------------------------------------------------------------------|
| <input type="radio"/> Molecular Assay (PCR, NAA)<br><input type="radio"/> Serology<br><input type="radio"/> Method unknown<br><input type="radio"/> Other, Specify<br><input type="text"/> | <input type="text"/>            | <input type="text"/>        | <input type="text"/>    | <input type="text"/>  | <input type="radio"/> Positive/<br>Presumptive Positive<br><br><input type="radio"/> Negative<br><br><input type="radio"/> Indeterminate<br><br><input type="radio"/> ND |

**Test 2**

| COVID-19 Test                                                                                                                                                                              | Collection Date<br>(mm/dd/yyyy) | Result Date<br>(mm/dd/yyyy) | Testing Facility<br>PFI | Other Facility<br>PFI | Test Result                                                                                                                                                              |
|--------------------------------------------------------------------------------------------------------------------------------------------------------------------------------------------|---------------------------------|-----------------------------|-------------------------|-----------------------|--------------------------------------------------------------------------------------------------------------------------------------------------------------------------|
| <input type="radio"/> Molecular Assay (PCR, NAA)<br><input type="radio"/> Serology<br><input type="radio"/> Method unknown<br><input type="radio"/> Other, Specify<br><input type="text"/> | <input type="text"/>            | <input type="text"/>        | <input type="text"/>    | <input type="text"/>  | <input type="radio"/> Positive/<br>Presumptive Positive<br><br><input type="radio"/> Negative<br><br><input type="radio"/> Indeterminate<br><br><input type="radio"/> ND |

**Test 3**

| COVID-19 Test                                                                                                                                                                              | Collection Date<br>(mm/dd/yyyy) | Result Date<br>(mm/dd/yyyy) | Testing Facility<br>PFI | Other Facility<br>PFI | Test Result                                                                                                                                                              |
|--------------------------------------------------------------------------------------------------------------------------------------------------------------------------------------------|---------------------------------|-----------------------------|-------------------------|-----------------------|--------------------------------------------------------------------------------------------------------------------------------------------------------------------------|
| <input type="radio"/> Molecular Assay (PCR, NAA)<br><input type="radio"/> Serology<br><input type="radio"/> Method unknown<br><input type="radio"/> Other, Specify<br><input type="text"/> | <input type="text"/>            | <input type="text"/>        | <input type="text"/>    | <input type="text"/>  | <input type="radio"/> Positive/<br>Presumptive Positive<br><br><input type="radio"/> Negative<br><br><input type="radio"/> Indeterminate<br><br><input type="radio"/> ND |

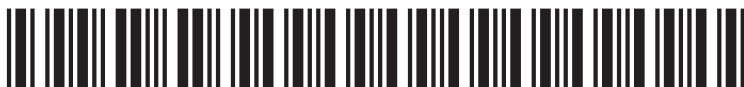

171-A

17100

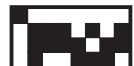



17100

171-A



### SARS-COV2 (COVID-19) Testing Results

**Test 4**

| COVID-19 Test                                                                                                                                                                              | Collection Date<br>(mm/dd/yyyy) | Result Date<br>(mm/dd/yyyy) | Testing Facility<br>PFI | Other Facility<br>PFI | Test Result                                                                                                                                                              |
|--------------------------------------------------------------------------------------------------------------------------------------------------------------------------------------------|---------------------------------|-----------------------------|-------------------------|-----------------------|--------------------------------------------------------------------------------------------------------------------------------------------------------------------------|
| <input type="radio"/> Molecular Assay (PCR, NAA)<br><input type="radio"/> Serology<br><input type="radio"/> Method unknown<br><input type="radio"/> Other, Specify<br><input type="text"/> | <input type="text"/>            | <input type="text"/>        | <input type="text"/>    | <input type="text"/>  | <input type="radio"/> Positive/<br>Presumptive Positive<br><br><input type="radio"/> Negative<br><br><input type="radio"/> Indeterminate<br><br><input type="radio"/> ND |

**Test 5**

| COVID-19 Test                                                                                                                                                                              | Collection Date<br>(mm/dd/yyyy) | Result Date<br>(mm/dd/yyyy) | Testing Facility<br>PFI | Other Facility<br>PFI | Test Result                                                                                                                                                              |
|--------------------------------------------------------------------------------------------------------------------------------------------------------------------------------------------|---------------------------------|-----------------------------|-------------------------|-----------------------|--------------------------------------------------------------------------------------------------------------------------------------------------------------------------|
| <input type="radio"/> Molecular Assay (PCR, NAA)<br><input type="radio"/> Serology<br><input type="radio"/> Method unknown<br><input type="radio"/> Other, Specify<br><input type="text"/> | <input type="text"/>            | <input type="text"/>        | <input type="text"/>    | <input type="text"/>  | <input type="radio"/> Positive/<br>Presumptive Positive<br><br><input type="radio"/> Negative<br><br><input type="radio"/> Indeterminate<br><br><input type="radio"/> ND |

**Test 6**

| COVID-19 Test                                                                                                                                                                              | Collection Date<br>(mm/dd/yyyy) | Result Date<br>(mm/dd/yyyy) | Testing Facility<br>PFI | Other Facility<br>PFI | Test Result                                                                                                                                                              |
|--------------------------------------------------------------------------------------------------------------------------------------------------------------------------------------------|---------------------------------|-----------------------------|-------------------------|-----------------------|--------------------------------------------------------------------------------------------------------------------------------------------------------------------------|
| <input type="radio"/> Molecular Assay (PCR, NAA)<br><input type="radio"/> Serology<br><input type="radio"/> Method unknown<br><input type="radio"/> Other, Specify<br><input type="text"/> | <input type="text"/>            | <input type="text"/>        | <input type="text"/>    | <input type="text"/>  | <input type="radio"/> Positive/<br>Presumptive Positive<br><br><input type="radio"/> Negative<br><br><input type="radio"/> Indeterminate<br><br><input type="radio"/> ND |

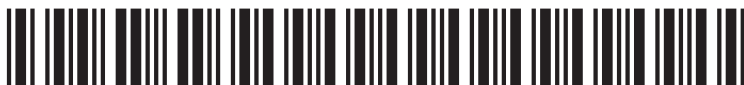

171-A

17100

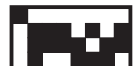

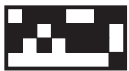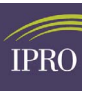

### SARS-COV2 (COVID-19) - ICU and Other Interventions

#### 1. Admissions to ICU

1a. Was the patient admitted to an intensive care unit (ICU)?

Yes  No  Unknown

Date of ICU Admission

Unknown Date of ICU Admission

Yes

Date of ICU Discharge

Unknown Date of ICU Discharge

Yes

1b. Was the patient admitted ICU a second time?

Yes  No  Unknown

Date of ICU Admission

Unknown Date of ICU Admission

Yes

Date of ICU Discharge

Unknown Date of ICU Discharge

Yes

1c. Was the patient admitted ICU a third time?

Yes  No  Unknown

Date of ICU Admission

Unknown Date of ICU Admission

Yes

Date of ICU Discharge

Unknown Date of ICU Discharge

Yes

2. BIPAP or CPAP use?

Yes  No  Unknown

Start Date

Unknown Start Date

Stop Date

Unknown Stop Date

2a. Nasal cannula (not high flow)

Yes  No  Unknown

3. High flow nasal cannula (e.g., Vapotherm)

Yes  No  Unknown

4. Invasive mechanical ventilation?

Yes  No  Unknown

5. ECMO

Yes  No  Unknown

6. Vasopressor use?

Yes  No  Unknown

7. Systemic steroids

Yes  No  Unknown

Sequential organ failure assessment score (SOFA)

SOFA Date:

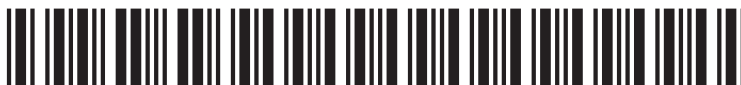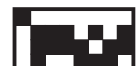



17200

172-A



### COVID-19 - ICU, Other Interventions, Outcome

#### Outcome

1. What was the outcome of the patient upon discharge?  Alive  Died during hospitalization  Unknown

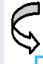

2. Date of Death

Cause of Death (open text)

Cause of death (ICD-10 codes)

|                      |                      |                      |
|----------------------|----------------------|----------------------|
| <input type="text"/> | <input type="text"/> | <input type="text"/> |
| <input type="text"/> | <input type="text"/> | <input type="text"/> |
| <input type="text"/> | <input type="text"/> | <input type="text"/> |
| <input type="text"/> | <input type="text"/> | <input type="text"/> |

3. If patient discharged alive, please indicate to where:

- Private residence
- Home with services
- Hospice
- Facility
- Homeless/shelter
- Corrections facility
- Leave against medical advice
- Discharged to another facility
- Other, specify
- Unknown

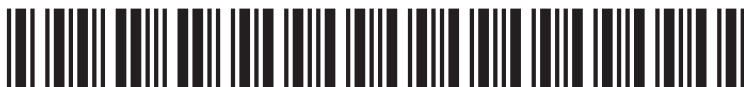

172-A

17200

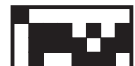

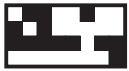

17300

173-A

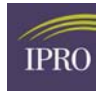

### Admission Signs and Patient History

#### 1. Acute signs/symptoms present at admission

None of the below signs/symptoms

Non-respiratory symptoms

- Abdominal pain
- Altered mental status/ confusion
- Chest pain
- Conjunctivitis
- Diarrhea
- Fever/ chills
- Headache
- Muscle aches/ myalgia
- Nausea/ vomiting
- Rash
- Seizures
- Loss of taste
- Loss of smell

Respiratory symptoms

- Congested/ runny nose
- Cough
- Hemoptysis/ Bloody sputum
- Shortness of breath/ Respiratory distress
- Sore throat
- URI/ ILI
- Wheezing

For cases < 2 years

- Apnea
- Cyanosis
- Decreased vocalization/ stridor
- Dehydration
- Hypothermia
- Inability to eat/ poor feeding
- Lethargy

#### 2. Date of onset of acute respiratory symptoms

Unknown  Not Applicable

#### 3. Height

Inch  cm  Unknown

#### 4. Weight

lbs  kg  Unknown

#### 5. BMI

Unknown **Obese:**  Yes  No  Unknown

BMI Final

Unknown

#### 6. Smoker (tobacco)

Current  Former  No  Unknown

#### 7. Vaping

Current  Former  No  Unknown

#### 8. Alcohol abuse

Current  Former  No  Unknown

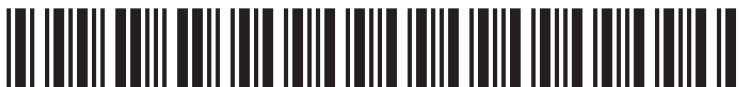

Please print carefully and avoid contact with the edges of the box.

1 2 3 4 5 6 7 8 9 0

17300

173-A

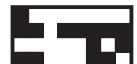



### First Vital Signs and First Lab Values

|                                                     |                                                                                                                                                                                                                                                  |                                                                                               |
|-----------------------------------------------------|--------------------------------------------------------------------------------------------------------------------------------------------------------------------------------------------------------------------------------------------------|-----------------------------------------------------------------------------------------------|
| 1. Heart rate (beats/ min)                          | <input type="text"/> <input type="text"/> <input type="text"/> <input type="text"/>                                                                                                                                                              | <input type="radio"/> Unknown                                                                 |
| 2. Respiratory rate (breaths/min)                   | <input type="text"/> <input type="text"/> <input type="text"/> <input type="text"/>                                                                                                                                                              | <input type="radio"/> Unknown                                                                 |
| 3. Systolic blood pressure (mmhg)                   | <input type="text"/> <input type="text"/> <input type="text"/> <input type="text"/> <input type="text"/>                                                                                                                                         | <input type="radio"/> Unknown                                                                 |
| 4. Diastolic blood pressure (mmhg)                  | <input type="text"/> <input type="text"/> <input type="text"/> <input type="text"/> <input type="text"/>                                                                                                                                         | <input type="radio"/> Unknown                                                                 |
| 5. Temperature                                      | <input type="text"/> <input type="text"/> <input type="text"/> <input type="text"/> <input type="text"/> <input type="radio"/> °C<br><input type="radio"/> °F                                                                                    | <input type="radio"/> Unknown                                                                 |
| 6a. O2 Saturation                                   | <input type="text"/> <input type="text"/> <input type="text"/> <input type="text"/> <input type="text"/> %                                                                                                                                       | <input type="radio"/> Unknown                                                                 |
| 6b. Type of support when O2 saturation was measured | <input type="radio"/> Room air <input type="radio"/> Face mask<br><input type="radio"/> Invasive mechanical ventilation <input type="radio"/> CPAP or BIPAP<br><input type="radio"/> Nasal cannula <input type="radio"/> High flow nasal cannula | <input type="radio"/> Other, specify<br><input type="text"/><br><input type="radio"/> Unknown |
| 6c. Fraction of inspired Oxygen/ flow               | <input type="text"/> <input type="text"/> <input type="text"/> <input type="text"/> <input type="radio"/> %L <input type="radio"/> Liters/ minute (LPM)                                                                                          | <input type="radio"/> Unknown <input type="radio"/> N/A                                       |
| 7. Glasgow coma scale (GCS)                         | <input type="text"/> <input type="text"/> <input type="text"/> <input type="text"/>                                                                                                                                                              | <input type="radio"/> Unknown <input type="radio"/> N/A                                       |
| 8. White blood cell count                           | <input type="text"/> <input type="text"/> <input type="text"/> <input type="text"/> <input type="text"/> <input type="radio"/> Cells x 10 <sup>9</sup> /L <input type="radio"/> x 1000/uL <input type="radio"/> Other: <input type="text"/>      | <input type="radio"/> N/A                                                                     |
| 9. Hematocrit (HCT)                                 | <input type="text"/> <input type="text"/> <input type="text"/> <input type="text"/> <input type="text"/> %                                                                                                                                       | <input type="radio"/> NA                                                                      |
| 10. Platelets (Plt)                                 | <input type="text"/> <input type="text"/> <input type="text"/> <input type="text"/> <input type="text"/> <input type="radio"/> Cells x 10 <sup>9</sup> /L <input type="radio"/> x 1000/uL <input type="radio"/> Other: <input type="text"/>      | <input type="radio"/> NA                                                                      |
| 11. Sodium (Na)                                     | <input type="text"/> <input type="text"/> <input type="text"/> <input type="text"/> <input type="text"/> <input type="radio"/> mmol/L <input type="radio"/> mEq/L <input type="radio"/> Other: <input type="text"/>                              | <input type="radio"/> NA                                                                      |
| 12. Blood urea nitrogen (BUN)                       | <input type="text"/> <input type="text"/> <input type="text"/> <input type="text"/> <input type="text"/> <input type="radio"/> mg/dl <input type="radio"/> Other: <input type="text"/>                                                           | <input type="radio"/> NA                                                                      |
| 13. Creatinine (Cr)                                 | <input type="text"/> <input type="text"/> <input type="text"/> <input type="text"/> <input type="text"/> <input type="radio"/> mg/dl <input type="radio"/> Other: <input type="text"/>                                                           | <input type="radio"/> NA                                                                      |
| 14. Glucose                                         | <input type="text"/> <input type="text"/> <input type="text"/> <input type="text"/> <input type="text"/> <input type="radio"/> mg/dl <input type="radio"/> Other: <input type="text"/>                                                           | <input type="radio"/> NA                                                                      |
| 15. Aspartate transaminase (AST)                    | <input type="text"/> <input type="text"/> <input type="text"/> <input type="text"/> <input type="text"/> <input type="radio"/> U/L <input type="radio"/> IU/L <input type="radio"/> Other: <input type="text"/>                                  | <input type="radio"/> NA                                                                      |
| 16. Alanine aminotransferase (ALT)                  | <input type="text"/> <input type="text"/> <input type="text"/> <input type="text"/> <input type="text"/> <input type="radio"/> U/L <input type="radio"/> IU/L <input type="radio"/> Other: <input type="text"/>                                  | <input type="radio"/> NA                                                                      |
| 17. Arterial pH                                     | <input type="text"/> <input type="text"/> <input type="text"/> <input type="text"/> <input type="text"/>                                                                                                                                         | <input type="radio"/> NA                                                                      |

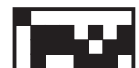



17400

174-A



### First Vital Signs and First Lab Values

|                          |                      |       |                               |
|--------------------------|----------------------|-------|-------------------------------|
| 18. LDH                  | <input type="text"/> | U/L   | <input type="radio"/> Unknown |
| 19. CRP                  | <input type="text"/> | mg/L  | <input type="radio"/> Unknown |
| 20. Ferritin             | <input type="text"/> | ng/mL | <input type="radio"/> Unknown |
| 21. D-dimer              | <input type="text"/> | ng/mL | <input type="radio"/> Unknown |
| 22. IL-6                 | <input type="text"/> | pg/mL | <input type="radio"/> Unknown |
| 23. (PCT) Pro-calcitonin | <input type="text"/> | ng/mL | <input type="radio"/> Unknown |
| 24. ESR                  | <input type="text"/> | mm/hr | <input type="radio"/> Unknown |
| 25. Fibrinogen           | <input type="text"/> | mg/dL | <input type="radio"/> Unknown |

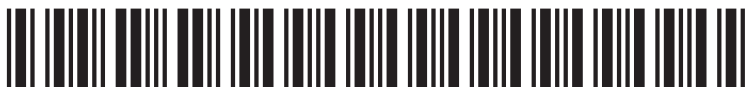

174-A

17400

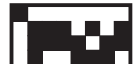



### Underlying Medical Conditions

1. Did the patient have any pre-existing medical conditions?

Yes  No  Unknown

1a. Chronic lung disease

Yes  No  Unknown

Chronic lung disease underlying conditions

- Active Tuberculosis (TB)
- Asbestosis
- Asthma/Reactive airway disease
- Bronchiectasis
- Bronchiolitis obliterans
- Chronic bronchitis
- Chronic respiratory failure
- Cystic Fibrosis (CF)
- Emphysema/Chronic obstructive pulmonary disease (COPD)
- Interstitial lung disease (ILD)
- Obstructive sleep apnea (OSA)
- Oxygen (O<sub>2</sub>) dependent
- Pulmonary fibrosis
- Restrictive lung disease
- Sarcoidosis

1b. Chronic metabolic disease

Yes  No  Unknown

Chronic metabolic disease underlying conditions

- Adrenal Disorders
- Diabetes mellitus (DM)
- Glycogen or other storage diseases
- Hyper/Hypo- function of pituitary gland
- Inborn errors of metabolism
- Metabolic syndrome
- Parathyroid dysfunction
- Thyroid dysfunction

1c. Blood disorders/ hemoglobinopathy

Yes  No  Unknown

Blood disorders/ hemoglobinopathy underlying conditions

- Alpha thalassemia
- Aplastic anemia
- Beta thalassemia
- Coagulopathy
- Hemoglobin S-beta thalassemia
- Leukopenia
- Myelodysplastic syndrome (MDS)
- Neutropenia
- Pancytopenia
- Polycythemia vera
- Sickle cell disease
- Splenectomy/Asplenia
- Thrombocytopenia



Please print carefully and avoid contact with the edges of the box.

1 2 3 4 5 6 7 8 9 0

Empty grid for patient information

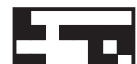



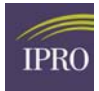

### Underlying Medical Conditions (Continued)

1d. Cardiovascular disease

Yes

No

Unknown

Cardiovascular disease underlying conditions

- Aortic aneurysm (AAA), history of
- Aortic/Mitral/Tricuspid/Pulmonic valve replacement
- Aortic regurgitation (AR)
- Aortic stenosis (AS)
- Atherosclerotic cardiovascular disease (ASCVD)
- Atrial fibrillation (AFib)
- Atrioventricular (AV) blocks
- Automated implantable devices (AID/AICD) / Pacemaker
- Bundle branch block (BBB, LBBB, RBBB)
- Cardiomyopathy
- Carotid stenosis
- Cerebral vascular accident (CVA)/ incident/ stroke, history of
- Congenital heart disease, (Specify below)
  - Atrial septal defect
  - Pulmonic stenosis
  - Tetralogy of Fallot
  - Ventricular septal defect
  - Other, specify
- Coronary artery bypass grafting (CABG), history of
- Coronary artery disease (CAD)
- Deep vein thrombosis (DVT), history of
- Heart failure/Congestive heart failure (CHF)
- Myocardial infarction (MI), history of
- Mitral regurgitation (MR)
- Mitral stenosis (MS)
- Peripheral artery disease (PAD)
- Peripheral vascular disease (PVD)
- Pulmonary embolism (PE)
- Pulmonary hypertension (PHTN), history of
- Pulmonic regurgitation
- Pulmonic stenosis
- Transient ischemic attack (TIA), history of
- Tricuspid regurgitation (TR)
- Tricuspid stenosis
- Ventricular fibrillation (VF, VFib), history of
- Ventricular tachycardia (VT, VTach), history of



Please print carefully and avoid contact with the edges of the box.

1 2 3 4 5 6 7 8 9 0

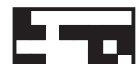

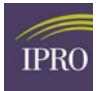

### Underlying Medical Conditions (Continued)

1e. Neurologic disorders  Yes  No  Unknown

Neurologic conditions

- Amyotrophic lateral sclerosis (ALS)
- Cerebral palsy
- Cognitive dysfunction
- Dementia/ Alzheimer's disease
- Developmental delay
- Down Syndrome/ Trisomy 21
- Edward's syndrome/ Trisomy 18
- Epilepsy/ Seizure/ Seizure disorder
- Mitochondrial disorder
- Multiple sclerosis (MS)
- Muscular dystrophy
- Myasthenia gravis (MG)
- Neural tube defects/ Spina bifida
- Neuropathy
- Parkinson's disease
- Plegias/ Paralysis/ Quadriplegia
- Scoliosis/ Kyphoscoliosis
- Traumatic brain injury (TBI), history of

1f. History of Guillain-Barre Syndrome  Yes  No  Unknown

1g. Immunocompromised condition  Yes  No  Unknown

Immunocompromised underlying conditions

- AIDS or CD4 count < 200
- Complement deficiency
- Grafts-Vs-Host disease (GVHD)
- HIV infection
- Immunoglobulin deficiency/ Immunodeficiency
- Immunosuppressive therapy  
Specify condition:
- Leukemia\*
- Lymphoma/ Hodgkins/ Non-Hodgkins (NHL)\*
- Metastatic cancer\*
- Multiple Myeloma\*
- Solid organ malignancy  
Specify organ:
- Steroid therapy
- Transplant, hematopoietic stem cell (bone marrow transplant (BMT), Peripheral stem cell transplant (PSCT))
- Transplant, solid organ (SOT), history of

1h. Renal disease  Yes  No  Unknown

Renal disease underlying conditions

- Chronic kidney disease (CKD)/ Chronic renal insufficiency (CRI)
- Dialysis (HD)
- End stage renal disease (ESRD)
- Glomerulonephritis (GN)
- Nephrotic syndrome
- Polycystic kidney disease (PCKD)

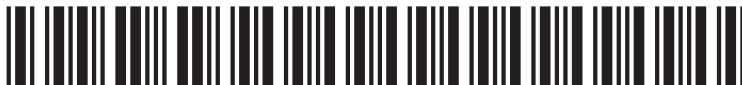

Please print carefully and avoid contact with the edges of the box.

1 2 3 4 5 6 7 8 9 0

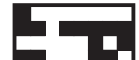



### Underlying Medical Conditions (Continued)

1i. Gastrointestinal/ liver disease

Yes

No

Unknown

Gastrointestinal/ liver disease underlying conditions

- Alcoholic hepatitis
- Autoimmune hepatitis
- Barrett's esophagitis
- Chronic liver disease
- Chronic pancreatitis
- Cirrhosis/ End stage liver disease (ESLD)
- Crohn's disease

- Esophageal varices
- Esophageal strictures
- Hepatitis B, chronic (HBV)
- Hepatitis C, chronic (HCV)
- Non-alcoholic fatty liver disease (NAFLD)/NASH
- Ulcerative colitis (UC)

1j. Rheumatologic/ autoimmune/ inflammatory condition

Yes

No

Unknown

Rheumatologic/ autoimmune/ inflammatory underlying conditions

- Ankylosing spondylitis
- Dermatomyositis
- Juvenile idiopathic arthritis
- Kawasaki disease
- Microscopic polyangiitis
- Polyarteritis nodosum (PAN)
- Polymyalgia rheumatica
- Polymyositis

- Psoriatic arthritis
- Rheumatoid arthritis (RA)
- Systemic lupus erythematosus (SLE)/ Lupus
- Systemic sclerosis
- Takayasu arteritis
- Temporal/ Giant cell arteritis
- Vasculitis, other

1k. Other

Yes

No

Unknown

Other underlying conditions

- Hypertension
- Post-partum
- Feeding tube dependent

- Trach dependent/ Vent dependent
- Wheelchair dependent
- Other

1l. Pediatric case only

Yes

No

Unknown

Pediatric cases only - underlying conditions

- Abnormality of airway
- Chronic lung disease of prematurity/ Bronchopulmonary dysplasia (BPD)

- History of febrile seizures
- Long term aspirin therapy
- Premature

Specify gestational age at birth in weeks:

Unknown



Please print carefully and avoid contact with the edges of the box.

1 2 3 4 5 6 7 8 9 0

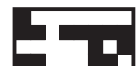

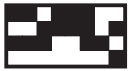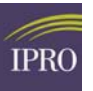

### Bacterial Pathogens (sterile or respiratory site only)

1. Were any bacterial culture tests performed with a collection date within 7 days of admission, or if deceased, within 3 days prior to death or 24 hours after death?

Yes       No       Unknown

2. If yes, was there a positive culture for a bacterial pathogen?

Yes       No       Unknown

In order to ensure that the collection site is connected to the pathogen, each column/date on this form should ONLY be used for one pathogen. Collect info on up to 5 pathogens (rather than 5 collection dates).

| Date (mm/dd/yyyy)    |
|----------------------|----------------------|----------------------|----------------------|----------------------|
| <input type="text"/> |

|                                    |                          |                          |                          |                          |                          |
|------------------------------------|--------------------------|--------------------------|--------------------------|--------------------------|--------------------------|
| Acinetobacter baumannii            | <input type="checkbox"/> |
| Acinetobacter species              | <input type="checkbox"/> |
| Enterobacter aerogenes             | <input type="checkbox"/> |
| Enterobacter cloacae               | <input type="checkbox"/> |
| Enterobacter species               | <input type="checkbox"/> |
| Enterococcus faecium               | <input type="checkbox"/> |
| Enterococcus faecalis              | <input type="checkbox"/> |
| Enterococcus species               | <input type="checkbox"/> |
| Escherichia coli                   | <input type="checkbox"/> |
|                                    |                          |                          |                          |                          |                          |
| Haemophilus influenzae             | <input type="checkbox"/> |
| Klebsiella oxtoca                  | <input type="checkbox"/> |
| Klebsiella pneumoniae              | <input type="checkbox"/> |
| Klebsiella Species                 | <input type="checkbox"/> |
| Listeria monocytogenes             | <input type="checkbox"/> |
| Legionella                         | <input type="checkbox"/> |
| Neisseria meningitides             | <input type="checkbox"/> |
| Proteus mirabilis                  | <input type="checkbox"/> |
| Pseudomonas aeruginosa             | <input type="checkbox"/> |
| Serratia marcescens                | <input type="checkbox"/> |
| Staphylococcus aureus,             | <input type="checkbox"/> |
| specify: Methicillin resistant (1) | <input type="radio"/>    |
| Methicillin sensitive (2)          | <input type="radio"/>    |
| Sensitivity unknown (3)            | <input type="radio"/>    |

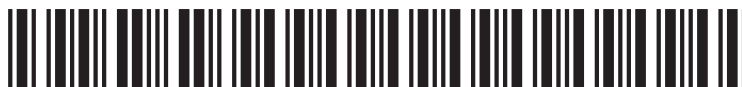

|                      |                      |                      |                      |                      |                      |                      |                      |                      |                      |
|----------------------|----------------------|----------------------|----------------------|----------------------|----------------------|----------------------|----------------------|----------------------|----------------------|
| <input type="text"/> |
|----------------------|----------------------|----------------------|----------------------|----------------------|----------------------|----------------------|----------------------|----------------------|----------------------|

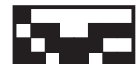

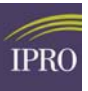

### Bacterial Pathogens (sterile or respiratory site only)

|                                       | Date (mm/dd/yyyy)        |
|---------------------------------------|--------------------------|--------------------------|--------------------------|--------------------------|--------------------------|
|                                       | <input type="text"/>     |
| Group A Streptococcus                 | <input type="checkbox"/> |
| Group B Streptococcus                 | <input type="checkbox"/> |
| Streptococcus agalactiae              | <input type="checkbox"/> |
| Streptococcus pneumoniae              | <input type="checkbox"/> |
| Streptococcus pyogenes                | <input type="checkbox"/> |
| Streptococcus viridans                | <input type="checkbox"/> |
| Other, specify <input type="text"/>   | <input type="checkbox"/> |
| <b>Site where pathogen identified</b> |                          |                          |                          |                          |                          |
| Blood                                 | <input type="checkbox"/> |
| Bronchoalveolar lavage                | <input type="checkbox"/> |
| Pleural fluid                         | <input type="checkbox"/> |
| Cerebrospinal fluid                   | <input type="checkbox"/> |
| Sputum                                | <input type="checkbox"/> |
| Endotracheal aspirate                 | <input type="checkbox"/> |
| Other, specify <input type="text"/>   | <input type="checkbox"/> |
|                                       |                          |                          |                          |                          |                          |
|                                       |                          |                          |                          |                          |                          |
|                                       |                          |                          |                          |                          |                          |
|                                       |                          |                          |                          |                          |                          |
|                                       |                          |                          |                          |                          |                          |
|                                       |                          |                          |                          |                          |                          |
|                                       |                          |                          |                          |                          |                          |
|                                       |                          |                          |                          |                          |                          |
|                                       |                          |                          |                          |                          |                          |



177-A

17700



### Viral Pathogen

1. Was patient tested for any viral pathogens within 14 days prior to or within 7 days after admission, or if deceased, 14 days prior to death or 24 hours after death?  Yes  No  Unknown

1a. RSV 

| Type | Date                 | <input type="radio"/> Yes, positive | <input type="radio"/> Yes, Negative | <input type="radio"/> Not tested/Unknown |
|------|----------------------|-------------------------------------|-------------------------------------|------------------------------------------|
|      | <input type="text"/> |                                     |                                     |                                          |

1b. Influenza A  H1N1-2009  H3N2  Other, please specify   Unknown 

| Type | Date                 | <input type="radio"/> Yes, positive | <input type="radio"/> Yes, Negative | <input type="radio"/> Not tested/Unknown |
|------|----------------------|-------------------------------------|-------------------------------------|------------------------------------------|
|      | <input type="text"/> |                                     |                                     |                                          |

1c. Influenza B  Victoria  Yamagata  Other, please specify   Unknown 

| Type | Date                 | <input type="radio"/> Yes, positive | <input type="radio"/> Yes, Negative | <input type="radio"/> Not Tested/Unknown |
|------|----------------------|-------------------------------------|-------------------------------------|------------------------------------------|
|      | <input type="text"/> |                                     |                                     |                                          |

1d. Flu (not subtyped) result 

| Date                 | <input type="radio"/> Yes, positive | <input type="radio"/> Yes, Negative | <input type="radio"/> Not Tested/Unknown |
|----------------------|-------------------------------------|-------------------------------------|------------------------------------------|
| <input type="text"/> |                                     |                                     |                                          |

1e. Adenovirus result 

| Date                 | <input type="radio"/> Yes, positive | <input type="radio"/> Yes, Negative | <input type="radio"/> Not Tested/Unknown |
|----------------------|-------------------------------------|-------------------------------------|------------------------------------------|
| <input type="text"/> |                                     |                                     |                                          |

1f. Parainfluenza 1 result 

| Date                 | <input type="radio"/> Yes, positive | <input type="radio"/> Yes, Negative | <input type="radio"/> Not Tested/Unknown |
|----------------------|-------------------------------------|-------------------------------------|------------------------------------------|
| <input type="text"/> |                                     |                                     |                                          |

1g. Parainfluenza 2 result 

| Date                 | <input type="radio"/> Yes, positive | <input type="radio"/> Yes, Negative | <input type="radio"/> Not Tested/Unknown |
|----------------------|-------------------------------------|-------------------------------------|------------------------------------------|
| <input type="text"/> |                                     |                                     |                                          |

1h. Parainfluenza 3 result 

| Date                 | <input type="radio"/> Yes, positive | <input type="radio"/> Yes, Negative | <input type="radio"/> Not Tested/Unknown |
|----------------------|-------------------------------------|-------------------------------------|------------------------------------------|
| <input type="text"/> |                                     |                                     |                                          |

1i. Parainfluenza 4 result 

| Date                 | <input type="radio"/> Yes, positive | <input type="radio"/> Yes, Negative | <input type="radio"/> Not Tested/Unknown |
|----------------------|-------------------------------------|-------------------------------------|------------------------------------------|
| <input type="text"/> |                                     |                                     |                                          |

1j. Human metapneumovirus (HMPV) result 

| Date                 | <input type="radio"/> Yes, positive | <input type="radio"/> Yes, Negative | <input type="radio"/> Not Tested/Unknown |
|----------------------|-------------------------------------|-------------------------------------|------------------------------------------|
| <input type="text"/> |                                     |                                     |                                          |

1k. Rhinovirus/ enterovirus result 

| Date                 | <input type="radio"/> Yes, positive | <input type="radio"/> Yes, Negative | <input type="radio"/> Not Tested/Unknown |
|----------------------|-------------------------------------|-------------------------------------|------------------------------------------|
| <input type="text"/> |                                     |                                     |                                          |

1l. Coronavirus 229E result 

| Date                 | <input type="radio"/> Yes, positive | <input type="radio"/> Yes, Negative | <input type="radio"/> Not Tested/Unknown |
|----------------------|-------------------------------------|-------------------------------------|------------------------------------------|
| <input type="text"/> |                                     |                                     |                                          |

1m. Coronavirus HKU1 result 

| Date                 | <input type="radio"/> Yes, positive | <input type="radio"/> Yes, Negative | <input type="radio"/> Not Tested/Unknown |
|----------------------|-------------------------------------|-------------------------------------|------------------------------------------|
| <input type="text"/> |                                     |                                     |                                          |

1n. Coronavirus NL63 result 

| Date                 | <input type="radio"/> Yes, positive | <input type="radio"/> Yes, Negative | <input type="radio"/> Not Tested/Unknown |
|----------------------|-------------------------------------|-------------------------------------|------------------------------------------|
| <input type="text"/> |                                     |                                     |                                          |

1o. Coronavirus OC43 result 

| Date                 | <input type="radio"/> Yes, positive | <input type="radio"/> Yes, Negative | <input type="radio"/> Not Tested/Unknown |
|----------------------|-------------------------------------|-------------------------------------|------------------------------------------|
| <input type="text"/> |                                     |                                     |                                          |

1p. Coronavirus (unsubtyped) result 

| Date                 | <input type="radio"/> Yes, positive | <input type="radio"/> Yes, Negative | <input type="radio"/> Not Tested/Unknown |
|----------------------|-------------------------------------|-------------------------------------|------------------------------------------|
| <input type="text"/> |                                     |                                     |                                          |



177-A

17700

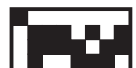

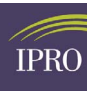

### COVID-19 Treatment

1. Did the patient receive hydroxychloroquine, chloroquine or azithromycin treatments during the course of this illness  Yes  No  Unknown

1a. Did patient receive hydroxychloroquine (Plaquenil, Quineprox)?  Yes  No  Unknown

|                               |                                    |                                   |                                        |                                                              |                                                              |
|-------------------------------|------------------------------------|-----------------------------------|----------------------------------------|--------------------------------------------------------------|--------------------------------------------------------------|
| hydroxychloroquine            | Start Date<br><input type="text"/> | Stop Date<br><input type="text"/> | Method of administration               | Dosage                                                       | Frequency                                                    |
| <input type="radio"/> Unknown | <input type="radio"/> Unknown      | <input type="radio"/> Unknown     | <input type="radio"/> Oral (po)        | <input type="radio"/> 200mg                                  | <input type="radio"/> QD                                     |
|                               |                                    |                                   | <input type="radio"/> Intravenous (IV) | <input type="radio"/> 100mg                                  | <input type="radio"/> BID                                    |
|                               |                                    |                                   | <input type="radio"/> Inhaled          | <input type="radio"/> Other, specify<br><input type="text"/> | <input type="radio"/> TID                                    |
|                               |                                    |                                   | <input type="radio"/> Unknown          | <input type="radio"/> Unknown                                | <input type="radio"/> QOD                                    |
|                               |                                    |                                   |                                        |                                                              | <input type="radio"/> Other, specify<br><input type="text"/> |
|                               |                                    |                                   |                                        |                                                              | <input type="radio"/> Unknown                                |

|                               |                                    |                                   |                                        |                                                              |                                                              |
|-------------------------------|------------------------------------|-----------------------------------|----------------------------------------|--------------------------------------------------------------|--------------------------------------------------------------|
| hydroxychloroquine            | Start Date<br><input type="text"/> | Stop Date<br><input type="text"/> | Method of administration               | Dosage                                                       | Frequency                                                    |
| <input type="radio"/> Unknown | <input type="radio"/> Unknown      | <input type="radio"/> Unknown     | <input type="radio"/> Oral (po)        | <input type="radio"/> 200mg                                  | <input type="radio"/> QD                                     |
|                               |                                    |                                   | <input type="radio"/> Intravenous (IV) | <input type="radio"/> 100mg                                  | <input type="radio"/> BID                                    |
|                               |                                    |                                   | <input type="radio"/> Inhaled          | <input type="radio"/> Other, specify<br><input type="text"/> | <input type="radio"/> TID                                    |
|                               |                                    |                                   | <input type="radio"/> Unknown          | <input type="radio"/> Unknown                                | <input type="radio"/> QOD                                    |
|                               |                                    |                                   |                                        |                                                              | <input type="radio"/> Other, specify<br><input type="text"/> |
|                               |                                    |                                   |                                        |                                                              | <input type="radio"/> Unknown                                |

|                               |                                    |                                   |                                        |                                                              |                                                              |
|-------------------------------|------------------------------------|-----------------------------------|----------------------------------------|--------------------------------------------------------------|--------------------------------------------------------------|
| hydroxychloroquine            | Start Date<br><input type="text"/> | Stop Date<br><input type="text"/> | Method of administration               | Dosage                                                       | Frequency                                                    |
| <input type="radio"/> Unknown | <input type="radio"/> Unknown      | <input type="radio"/> Unknown     | <input type="radio"/> Oral (po)        | <input type="radio"/> 200mg                                  | <input type="radio"/> QD                                     |
|                               |                                    |                                   | <input type="radio"/> Intravenous (IV) | <input type="radio"/> 100mg                                  | <input type="radio"/> BID                                    |
|                               |                                    |                                   | <input type="radio"/> Inhaled          | <input type="radio"/> Other, specify<br><input type="text"/> | <input type="radio"/> TID                                    |
|                               |                                    |                                   | <input type="radio"/> Unknown          | <input type="radio"/> Unknown                                | <input type="radio"/> QOD                                    |
|                               |                                    |                                   |                                        |                                                              | <input type="radio"/> Other, specify<br><input type="text"/> |
|                               |                                    |                                   |                                        |                                                              | <input type="radio"/> Unknown                                |

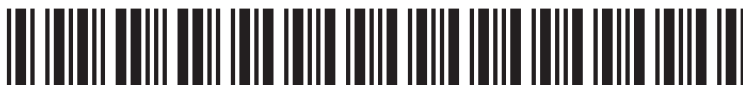

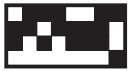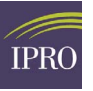

### COVID-19 Treatment

1b. Did patient receive Chloroquine (*Aralen, Aralen Phosphate, Aralen Hydrochloride*) ?  Yes  No  Unknown

|             |                               |                               |                                                                                                                                             |                                                                                                                                                          |                                                                                                                                                                                                               |
|-------------|-------------------------------|-------------------------------|---------------------------------------------------------------------------------------------------------------------------------------------|----------------------------------------------------------------------------------------------------------------------------------------------------------|---------------------------------------------------------------------------------------------------------------------------------------------------------------------------------------------------------------|
| Chloroquine | Start Date                    | Stop Date                     | Method of administration                                                                                                                    | Dosage                                                                                                                                                   | Frequency                                                                                                                                                                                                     |
|             | <input type="text"/>          | <input type="text"/>          | <input type="radio"/> Oral (po)<br><input type="radio"/> Intravenous (IV)<br><input type="radio"/> Inhaled<br><input type="radio"/> Unknown | <input type="radio"/> 200mg<br><input type="radio"/> 100mg<br><input type="radio"/> Other, specify <input type="text"/><br><input type="radio"/> Unknown | <input type="radio"/> QD<br><input type="radio"/> BID<br><input type="radio"/> TID<br><input type="radio"/> QOD<br><input type="radio"/> Other, specify <input type="text"/><br><input type="radio"/> Unknown |
|             | <input type="radio"/> Unknown | <input type="radio"/> Unknown |                                                                                                                                             |                                                                                                                                                          |                                                                                                                                                                                                               |

|             |                               |                               |                                                                                                                                             |                                                                                                                                                          |                                                                                                                                                                                                               |
|-------------|-------------------------------|-------------------------------|---------------------------------------------------------------------------------------------------------------------------------------------|----------------------------------------------------------------------------------------------------------------------------------------------------------|---------------------------------------------------------------------------------------------------------------------------------------------------------------------------------------------------------------|
| Chloroquine | Start Date                    | Stop Date                     | Method of administration                                                                                                                    | Dosage                                                                                                                                                   | Frequency                                                                                                                                                                                                     |
|             | <input type="text"/>          | <input type="text"/>          | <input type="radio"/> Oral (po)<br><input type="radio"/> Intravenous (IV)<br><input type="radio"/> Inhaled<br><input type="radio"/> Unknown | <input type="radio"/> 200mg<br><input type="radio"/> 100mg<br><input type="radio"/> Other, specify <input type="text"/><br><input type="radio"/> Unknown | <input type="radio"/> QD<br><input type="radio"/> BID<br><input type="radio"/> TID<br><input type="radio"/> QOD<br><input type="radio"/> Other, specify <input type="text"/><br><input type="radio"/> Unknown |
|             | <input type="radio"/> Unknown | <input type="radio"/> Unknown |                                                                                                                                             |                                                                                                                                                          |                                                                                                                                                                                                               |

|             |                               |                               |                                                                                                                                             |                                                                                                                                                          |                                                                                                                                                                                                               |
|-------------|-------------------------------|-------------------------------|---------------------------------------------------------------------------------------------------------------------------------------------|----------------------------------------------------------------------------------------------------------------------------------------------------------|---------------------------------------------------------------------------------------------------------------------------------------------------------------------------------------------------------------|
| Chloroquine | Start Date                    | Stop Date                     | Method of administration                                                                                                                    | Dosage                                                                                                                                                   | Frequency                                                                                                                                                                                                     |
|             | <input type="text"/>          | <input type="text"/>          | <input type="radio"/> Oral (po)<br><input type="radio"/> Intravenous (IV)<br><input type="radio"/> Inhaled<br><input type="radio"/> Unknown | <input type="radio"/> 200mg<br><input type="radio"/> 100mg<br><input type="radio"/> Other, specify <input type="text"/><br><input type="radio"/> Unknown | <input type="radio"/> QD<br><input type="radio"/> BID<br><input type="radio"/> TID<br><input type="radio"/> QOD<br><input type="radio"/> Other, specify <input type="text"/><br><input type="radio"/> Unknown |
|             | <input type="radio"/> Unknown | <input type="radio"/> Unknown |                                                                                                                                             |                                                                                                                                                          |                                                                                                                                                                                                               |

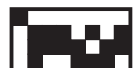





### COVID-19 Treatment

1c. Did patient receive Azithromycin (*Zithromax, Azithromycin Dose Pakc, Z-Pack, Zmax*) ?  Yes  No  Unknown

|              |                                    |                                   |                                        |                                                              |                                                              |
|--------------|------------------------------------|-----------------------------------|----------------------------------------|--------------------------------------------------------------|--------------------------------------------------------------|
| Azithromycin | Start Date<br><input type="text"/> | Stop Date<br><input type="text"/> | Method of administration               | Dosage                                                       | Frequency                                                    |
|              | <input type="radio"/> Unknown      | <input type="radio"/> Unknown     | <input type="radio"/> Oral (po)        | <input type="radio"/> 200mg                                  | <input type="radio"/> QD                                     |
|              |                                    |                                   | <input type="radio"/> Intravenous (IV) | <input type="radio"/> 100mg                                  | <input type="radio"/> BID                                    |
|              |                                    |                                   | <input type="radio"/> Inhaled          | <input type="radio"/> Other, specify<br><input type="text"/> | <input type="radio"/> TID                                    |
|              |                                    |                                   | <input type="radio"/> Unknown          | <input type="radio"/> Unknown                                | <input type="radio"/> QOD                                    |
|              |                                    |                                   |                                        |                                                              | <input type="radio"/> Other, specify<br><input type="text"/> |
|              |                                    |                                   |                                        |                                                              | <input type="radio"/> Unknown                                |

|              |                                    |                                   |                                        |                                                              |                                                              |
|--------------|------------------------------------|-----------------------------------|----------------------------------------|--------------------------------------------------------------|--------------------------------------------------------------|
| Azithromycin | Start Date<br><input type="text"/> | Stop Date<br><input type="text"/> | Method of administration               | Dosage                                                       | Frequency                                                    |
|              | <input type="radio"/> Unknown      | <input type="radio"/> Unknown     | <input type="radio"/> Oral (po)        | <input type="radio"/> 200mg                                  | <input type="radio"/> QD                                     |
|              |                                    |                                   | <input type="radio"/> Intravenous (IV) | <input type="radio"/> 100mg                                  | <input type="radio"/> BID                                    |
|              |                                    |                                   | <input type="radio"/> Inhaled          | <input type="radio"/> Other, specify<br><input type="text"/> | <input type="radio"/> TID                                    |
|              |                                    |                                   | <input type="radio"/> Unknown          | <input type="radio"/> Unknown                                | <input type="radio"/> QOD                                    |
|              |                                    |                                   |                                        |                                                              | <input type="radio"/> Other, specify<br><input type="text"/> |
|              |                                    |                                   |                                        |                                                              | <input type="radio"/> Unknown                                |

|              |                                    |                                   |                                        |                                                              |                                                              |
|--------------|------------------------------------|-----------------------------------|----------------------------------------|--------------------------------------------------------------|--------------------------------------------------------------|
| Azithromycin | Start Date<br><input type="text"/> | Stop Date<br><input type="text"/> | Method of administration               | Dosage                                                       | Frequency                                                    |
|              | <input type="radio"/> Unknown      | <input type="radio"/> Unknown     | <input type="radio"/> Oral (po)        | <input type="radio"/> 200mg                                  | <input type="radio"/> QD                                     |
|              |                                    |                                   | <input type="radio"/> Intravenous (IV) | <input type="radio"/> 100mg                                  | <input type="radio"/> BID                                    |
|              |                                    |                                   | <input type="radio"/> Inhaled          | <input type="radio"/> Other, specify<br><input type="text"/> | <input type="radio"/> TID                                    |
|              |                                    |                                   | <input type="radio"/> Unknown          | <input type="radio"/> Unknown                                | <input type="radio"/> QOD                                    |
|              |                                    |                                   |                                        |                                                              | <input type="radio"/> Other, specify<br><input type="text"/> |
|              |                                    |                                   |                                        |                                                              | <input type="radio"/> Unknown                                |

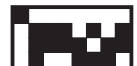



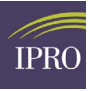

### COVID-19 Treatment

**NSAIDS:**

|                                                              |                           |                          |                               |
|--------------------------------------------------------------|---------------------------|--------------------------|-------------------------------|
| Aspirin                                                      | <input type="radio"/> Yes | <input type="radio"/> No | <input type="radio"/> Unknown |
| Celecoxib (Celebrex)                                         | <input type="radio"/> Yes | <input type="radio"/> No | <input type="radio"/> Unknown |
| Diclofenac (Cambia, Cataflam, Voltaren-XR, Zipsor, Zorvolex) | <input type="radio"/> Yes | <input type="radio"/> No | <input type="radio"/> Unknown |
| Ibuprofen (Motrin, Advil)                                    | <input type="radio"/> Yes | <input type="radio"/> No | <input type="radio"/> Unknown |
| Indomethacin (Indocin)                                       | <input type="radio"/> Yes | <input type="radio"/> No | <input type="radio"/> Unknown |
| Naproxen (Aleve, Anaprox, Naprelan, Naprosyn)                | <input type="radio"/> Yes | <input type="radio"/> No | <input type="radio"/> Unknown |
| Oxaprozin (Daypro)                                           | <input type="radio"/> Yes | <input type="radio"/> No | <input type="radio"/> Unknown |
| Piroxicam (Feldene)                                          | <input type="radio"/> Yes | <input type="radio"/> No | <input type="radio"/> Unknown |



Grid of 10 empty boxes for data entry

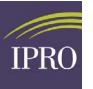

### COVID-19 Chest Imaging, Pregnancy, Adverse Effect of Medication

#### Chest Imaging

1. Was a chest x-ray taken during hospitalization?  Yes  No  Unknown

2. Were any of these chest x-rays abnormal?  Yes  No  Unknown

2a. Date of first abnormal chest x-ray

2b. For the first abnormal chest x-ray, please check all that apply

- Report not available
- Air space density
- Air space opacity
- Bronchopneumonia/ pneumonia
- Cannot rule out pneumonia
- Consolidation
- Cavitation
- ARDS (Acute Respiratory Distress Syndrome)
- Lung infiltrate
- Interstitial infiltrate
- Lobar (NOT interstitial) infiltrate
- Pleural Effusion
- Empyema
- Other

3. Was a chest CT/ MRI taken during hospitalization?  Yes  No  Unknown

4. Were any of these chest CT/ MRIs abnormal?  Yes  No  Unknown

4a. Date of first abnormal CT/MRI

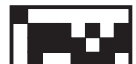

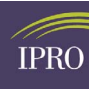

### Chest Imaging, Pregnancy and Adverse Effect of Medication

#### Pregnancy

- 1. Specify gestational age in weeks   Unknown
- 2. Indicate pregnancy status at discharge or death  Still pregnant  No longer pregnant  Unknown

#### Adverse Effect of Medication

- 1. Diarrhea at any time during hospital stay?  Yes  No  Unknown
- 2. Hypoglycemia at any time during hospital stay?  Yes  No  Unknown
- 3. Was EKG performed at any time during hospital stay?  Yes  No  Unknown
- 4. QT Prolongation on EKG at any time during hospital stay?  Yes  No  Unknown
- 5. Cardiac arrest at any time during hospital stay?  Yes  No  Unknown
- 6. Arrhythmia at any time during hospital stay  Yes  No  Unknown



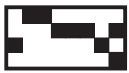

17000

# COVID-19 Study - Patient Demographic and Enrollment

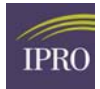

### Patient Last Name

### Patient First Name

MI

### Medical Record Number

### Medicaid Number

### Date of Birth (mm/dd/yyyy)

### Patient Address Type

- Residential
- Post Office Box
- Long-Term Care Facility
- Corrections
- Military
- Homeless
- Other (Assign this value for cases with a known address that does not conform to the above categories)
- Insufficient (Assign this value if the address could not be successfully geocoded)
- Missing- Assign this value if no address information is present (e.g. only county or zip code)

### Patient Zip Code

### Sex at Birth

- Male
- Female

### Hospital where patient treated

Name:

PFI:

Admission Date:

Discharge Date:

### Specify other hospital:

Name:

PFI:

### Race

- White
- Black
- Asian / Pacific Islander
- American Indian or Alaska Native
- Multiracial
- Not Specified
- ND

### Ethnicity

- Non-Hispanic/Latino
- Hispanic/Latino
- Unknown
- ND

### Was patient transferred from another hospital?

- Yes
- No
- Unknown

Name:

PFI:

Transfer Date:

### Patient resides in nursing home?

- Yes
- No
- Unknown

If yes, nursing home name:

### Pregnant:

- Yes
- No
- Unknown
- Not applicable (males)

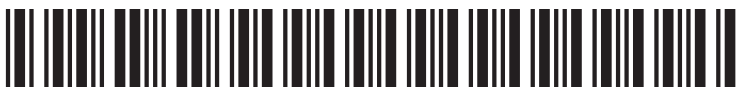

For optimum accuracy, please print in capital letters and avoid contact with the edge of the box.

|   |   |   |   |   |   |   |   |   |   |   |   |   |
|---|---|---|---|---|---|---|---|---|---|---|---|---|
| A | B | C | D | E | F | G | H | I | J | K | L | M |
| N | O | P | Q | R | S | T | U | V | W | X | Y | Z |

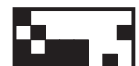

Supplement: Supplementary file 1 [file joi200055supp1_prod.pdf]
